# Supplementary material
Source: PubMed Central journal article supplement (PMC7357242)
Supplement: NIHMS1598769-supplement-1.pdf [file NIHMS1598769-supplement-1.pdf]

## Supplemental Fig. S1

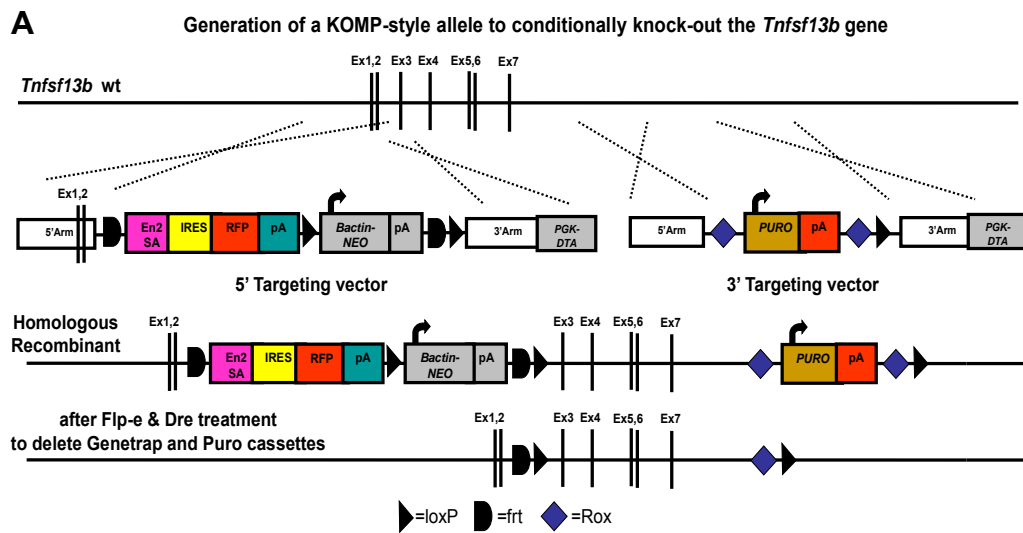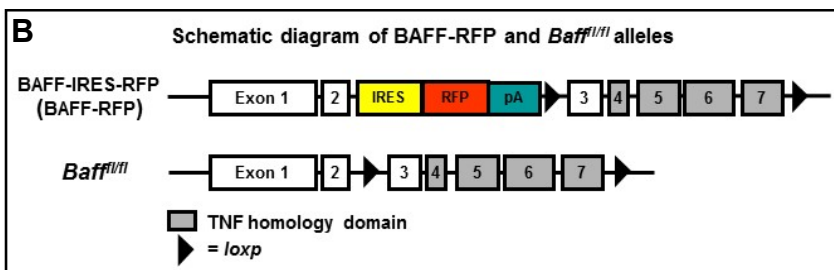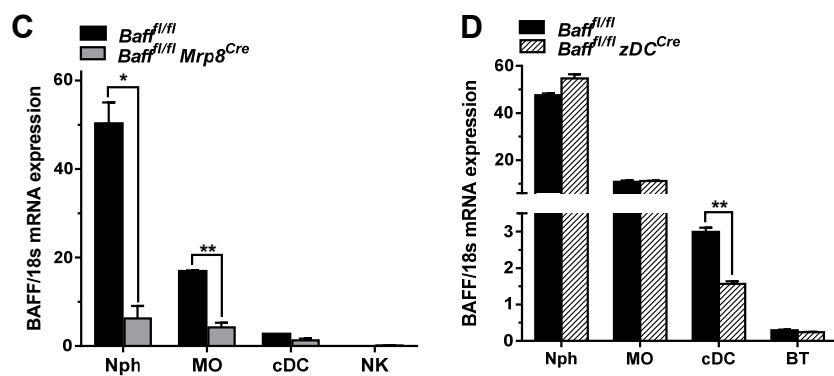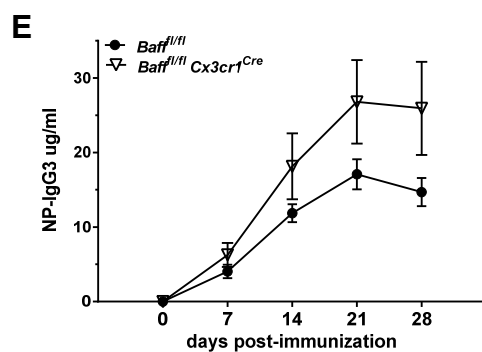

**Supplemental Figure S1. *Tnfsf13b* (BAFF) reporter mice expressing RFP, *Baff<sup>fl/fl</sup>* mice, and verification of conditional KO mice.** **A.** Schematic of the two-construct approach used to generate a KOMP-style allele to conditionally knock-out the *Tnfsf13b/Baff* gene. The *Tnfsf13b*-5' construct included a Genetrap Cassette expressing the TagRFPT (red fluorescence protein (RFP), under the control of an internal ribosome entry site (IRES) and flanked by *frt* sites for selective deletion, a loxP site and arms of homology of ~5kb each. The *Tnfsf13b*-5' construct was inserted between exons 2 and 3 of *Tnfsf13b* gene. Neomycin (*Neo*) and Diphtheria Toxin A (DTA) elements for positive and negative selection are indicated. The *Tnfsf13b*-3' construct was inserted after the last exon 7 in the intergenic region, and included the other loxP site, arms of homology (~5kb each), a Puromycin (*Puro*) and a DTA element. The *Tnfsf13b*-3' construct was electroporated first into ES cells, and a positive clone electroporated with the *Tnfsf13b*-5' construct. Homologous recombination of the two constructs generated the heterozygous BAFF-IRES-RFP (BAFF-RFP) reporter mice where *Tnfsf13b* is functionally knocked-out and the reporter expresses the IRES-RFP under *Tnfsf13b* promoter and the loxP sites between exon 3 and 7. The germline BAFF-RFP<sup>+/+</sup> mice were bred with B6N(B6J)-Tg(CAG-Flpo) mice to excise the Genetrap Cassette and *Neo*, and then with B6;129-Tg(CAG-dre) mice to remove *Puro*. The Flpo and Dre recombinases were bred out to generate *Baff<sup>fl/fl</sup>* mice expressing wild type *Baff* with floxed exons 3-7. **B.** Schematic diagram of BAFF-IRES-RFP (BAFF-RFP) and *Baff<sup>fl/fl</sup>* alleles. **C, D.** Splenocytes harvested from *Baff<sup>fl/fl</sup>* (**C, D**), *Baff<sup>fl/fl</sup> Mrp8<sup>Cre</sup>* mice (**C**), or *Baff<sup>fl/fl</sup> zDC<sup>Cre</sup>* mice (**D**), enriched with CD11b<sup>+</sup> CD11c<sup>+</sup> magnetic bead positive selection, sorted on a FACS Aria cell sorter and assessed for *Baff* mRNA by qPCR. **C, D.** Data show means ± SEM of relative *Baff* mRNA from one experiment pooling cells from six mice/group (**C**), or from one representative of two experiments pooling cells from six-seven mice/group (**D**). Selective depletion of BAFF in Nphs from *Baff<sup>fl/fl</sup> Mrp8<sup>Cre</sup>* mice was confirmed with sorted BM cells. **C, D.** Sorted cells from *Mrp8<sup>Cre</sup>* mice and *zDC<sup>Cre</sup>* mice showed similar *Baff* mRNA levels as *Baff<sup>fl/fl</sup>* mice (not shown). **C, D.** Statistics were determined with two-tailed unpaired Student's *t*-test, \* *p*<0.05, \*\* *p*<0.01. **E.** *Baff<sup>fl/fl</sup>* mice crossed with *Cx3cr1<sup>Cre</sup>* mice (1) to generate *Baff<sup>fl/fl</sup> Cx3cr1<sup>Cre</sup>* mice. *Baff* mRNA in sorted splenic MOs from *Baff<sup>fl/fl</sup> Cx3cr1<sup>Cre</sup>* mice was lower than in control MOs, confirming that BAFF was

knocked down just in the appropriate subset. *Baff<sup>fl/fl</sup>* mice and *Baff<sup>fl/fl</sup> Cx3cr1<sup>Cre</sup>* mice were immunized i.p. with 20 µg of NP-Ficoll, bled at the indicated time points, NP-specific IgG3 was analyzed by ELISA. Data show means ± SEM of NP-IgG3 and are from one experiment; *Baff<sup>fl/fl</sup>*, N=8; *Baff<sup>fl/fl</sup> Cx3cr1<sup>Cre</sup>*, N=6. Statistics were performed with 2-way ANOVA with Tukey's multiple comparison test.

1. Yona, S., K.-W. Kim, Y. Wolf, A. Mildner, D. Varol, M. Breker, D. Strauss-Ayali, S. Viukov, M. Guillemins, A. Misharin, D. A. Hume, H. Perlman, B. Malissen, E. Zelzer, and S. Jung. 2013. Fate Mapping Reveals Origins and Dynamics of Monocytes and Tissue Macrophages under Homeostasis. *Immunity* 38: 79–91.

## Supplemental Fig. S2

**A** Gating strategy for myeloid cell populations in Spleen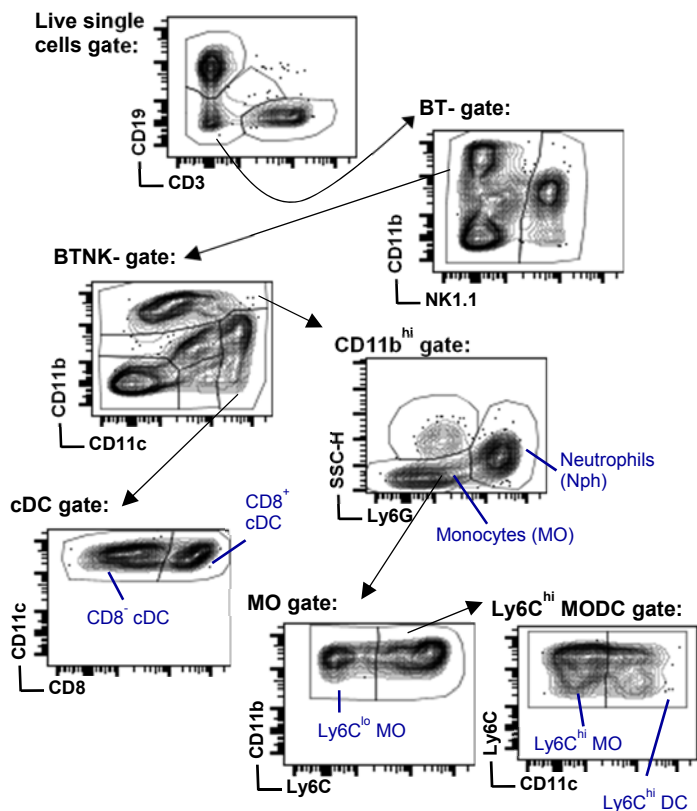**B** Gating strategy for myeloid cell populations in BM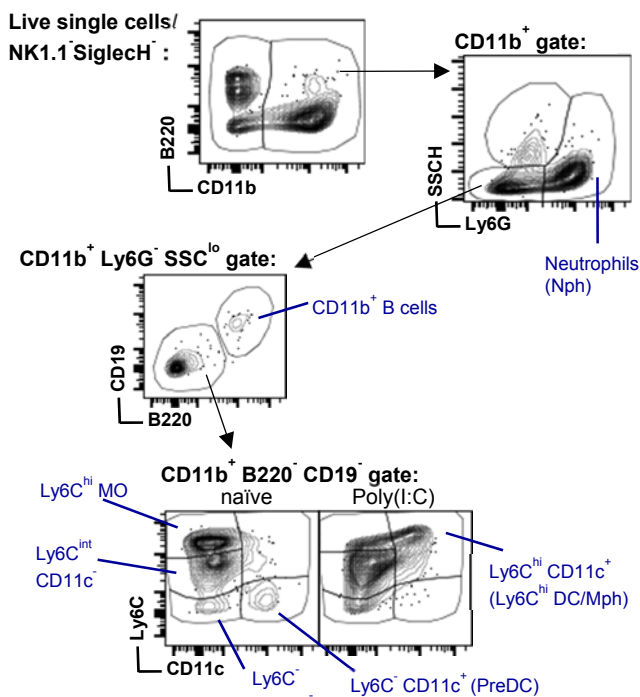**C** BM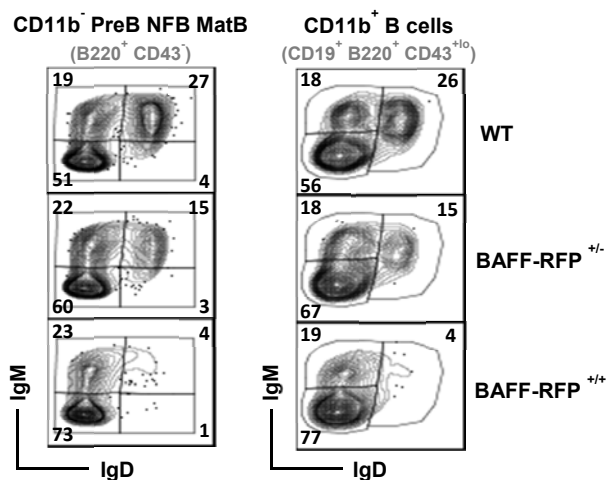**D**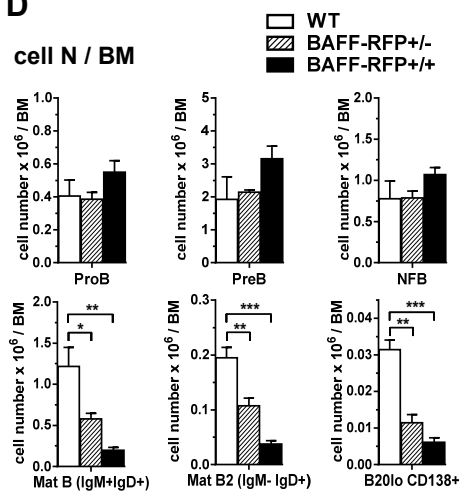

**Supplemental Figure S2. Analyses of myeloid cells and B cells in spleens and BMs from WT, BAFF-RFP<sup>+/-</sup> and BAFF-RFP<sup>+/+</sup> mice.** Gating strategy to identify myeloid cell populations in WT splenic (A) and BM cells (B). Debris, doublets and nonviable cells were excluded. A, splenic B cells (CD19<sup>+</sup>CD3<sup>-</sup>) and T cells (CD19<sup>-</sup>CD3<sup>+</sup>) were defined first; in non-B cells and non-T cells (CD19<sup>-</sup>CD3<sup>-</sup> gate) populations were defined as follows: **NK cells**, NK1.1<sup>+</sup>CD11b<sup>+/-</sup>; neutrophils (**Nphs**), CD11b<sup>hi</sup>Ly6G<sup>hi</sup>Ly6C<sup>int</sup>SSC<sup>int</sup>NK1.1<sup>-</sup>; Ly6C<sup>hi</sup> monocytes (**Ly6C<sup>hi</sup> MOs**), CD11b<sup>hi</sup>Ly6C<sup>hi</sup>CD11c<sup>-</sup>SSC<sup>-</sup>Ly6G<sup>-</sup>NK1.1<sup>-</sup>; Ly6C<sup>hi</sup> dendritic cells (**Ly6C<sup>hi</sup> DCs**), CD11b<sup>hi</sup>Ly6C<sup>hi</sup>CD11c<sup>hi</sup>SSC<sup>-</sup>Ly6G<sup>-</sup>NK1.1<sup>-</sup>; **Ly6C<sup>lo</sup> MOs**, CD11b<sup>int</sup>CD11c<sup>-</sup>Ly6C<sup>lo</sup>SSC<sup>-</sup>Ly6G<sup>-</sup>NK1.1<sup>-</sup>; plasmacytoid DCs (pDCs), SiglecH<sup>+</sup>CD11b<sup>-</sup>CD11c<sup>lo</sup>B220<sup>+</sup>Ly6G<sup>-</sup>NK1.1<sup>-</sup>; **CD8<sup>+</sup> cDCs**, CD11c<sup>hi</sup>CD8<sup>+</sup>B220<sup>-</sup>Ly6G<sup>-</sup>NK1.1<sup>-</sup>; **CD8<sup>-</sup> cDCs**, CD11c<sup>hi</sup>CD8<sup>-</sup>B220<sup>-</sup>Ly6G<sup>-</sup>NK1.1<sup>-</sup>. B, For the CD11b<sup>+</sup>B220<sup>-</sup>CD19<sup>-</sup> gate, BM cells are shown from mice treated or not for 24 h with Poly(I:C). BM NK cells (NK1.1<sup>+</sup>SiglecH<sup>-</sup>) and pDCs (NK1.1<sup>-</sup>SiglecH<sup>+</sup>) were defined and then gated out. In the NK1.1<sup>-</sup>SiglecH<sup>-</sup> gate CD11b<sup>+</sup> gated myeloid populations were defined as follows: neutrophils (**Nphs**), CD11b<sup>+</sup>Ly6G<sup>hi</sup>Ly6C<sup>int</sup>SSC<sup>int</sup>; **CD11b<sup>+</sup> B cells**, B220<sup>+</sup>CD19<sup>+</sup>CD11b<sup>+</sup>Ly6G<sup>-</sup>SSC<sup>-</sup>. In the **CD11b<sup>+</sup>B220<sup>-</sup>CD19<sup>-</sup>Ly6G<sup>-</sup>SSC<sup>-</sup>** gate we identified 5 populations of myeloid cells and precursors defined as follows (See also **Table S1**): **CD11b<sup>+</sup> myeloid precursors**, Ly6C<sup>-</sup>CD11c<sup>-</sup>CD115<sup>-</sup>CX3CR1<sup>-</sup>CCR2<sup>-</sup>MHCII<sup>-</sup>; **Nph precursors**, Ly6C<sup>int</sup>CD11c<sup>-</sup>CD115<sup>-</sup>CX3CR1<sup>-</sup>CCR2<sup>-</sup>MHCII<sup>-</sup>; **Ly6C<sup>hi</sup> MOs**, CD11c<sup>-</sup>CD115<sup>+</sup>CX3CR1<sup>+</sup>CCR2<sup>hi</sup>MHCII<sup>-</sup>; **preDCs**, CD11c<sup>+</sup>Ly6C<sup>-</sup>CD115<sup>+</sup>CX3CR1<sup>hi</sup>CCR2<sup>+</sup>MHCII<sup>+</sup>. After treatment with Poly(I:C) a BM Ly6C<sup>hi</sup> DC/Mph precursor (CD11c<sup>+</sup>CD115<sup>hi</sup>CX3CR1<sup>hi</sup>CCR2<sup>hi</sup>MHCII<sup>+</sup>) was substantially upregulated. In the NK1.1<sup>-</sup>SiglecH<sup>-</sup>CD11b<sup>-</sup> gate, B cell precursors were defined as described in Methods. C, D, B cell populations from naïve WT mice, BAFF-RFP<sup>+/-</sup> mice and BAFF-RFP<sup>+/+</sup> mice. C, representative plots of B220<sup>+</sup>CD43<sup>-</sup> (PreB NFB MatB) cells include preB cells, NF B cells, and mature B cells (*left panels*), and CD11b<sup>+</sup> B cells (*right panels*). D graphs show means ± SEM of cell numbers. Data are from one of two independent experiments performed with three mice per group. Statistics were performed by one-way ANOVA corrected with Holm-Sidak method for multiple comparisons; \*  $p < 0.05$ , \*\*  $p < 0.01$ , \*\*\*  $p < 0.001$ .

## Supplemental Fig. S3

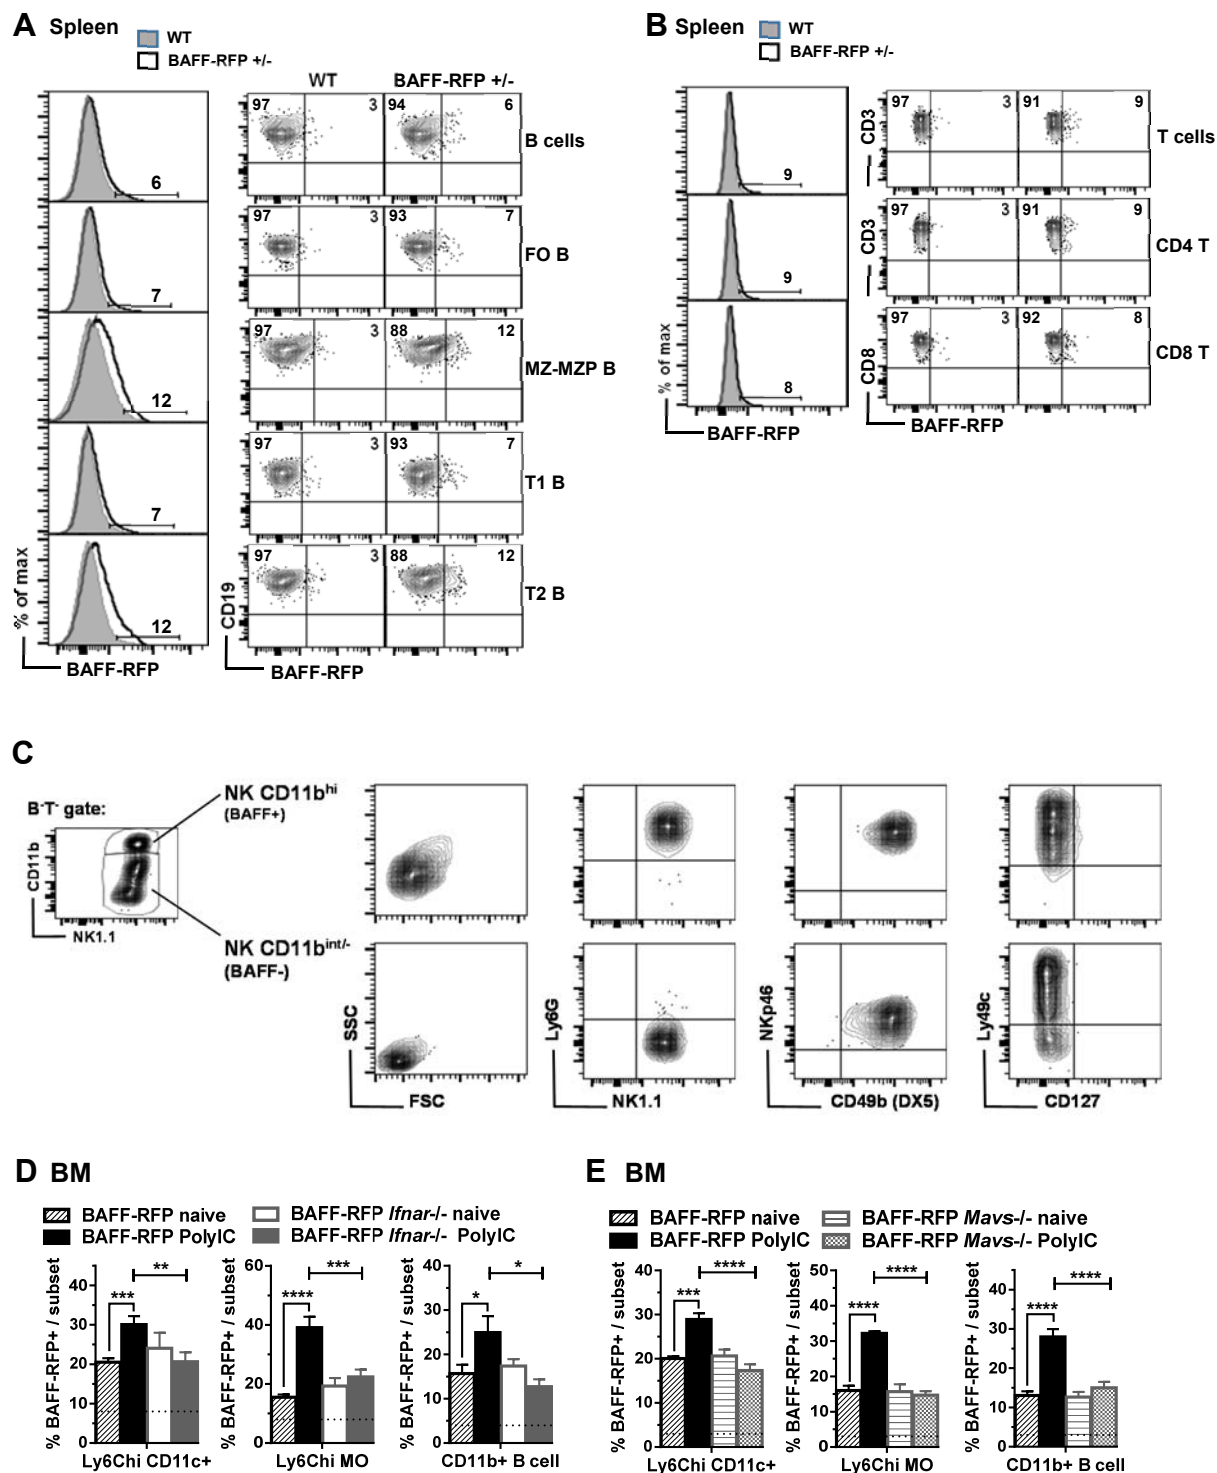

**Supplemental Figure S3. BAFF-RFP in B cell and T cell subsets, BAFF<sup>+</sup> CD11b<sup>hi</sup> NK cell phenotypes and requirement for MAVS for BAFF up-regulation in BM myeloid and B cell subsets by Poly(I:C).** **A** and **B**, BAFF-RFP expression detected by flow cytometry in splenic B cell subsets (**A**) and T cell subsets (**B**) from naïve BAFF-RFP<sup>+/-</sup> mice. RFP background control in WT (C57BL/6) mice is also shown. **A** and **B**, BAFF-RFP levels are shown as histograms on the left, BAFF-RFP<sup>+/-</sup> mice (*black empty histograms*), WT mice (*grey filled histograms*); and on the right as dot plots. Data show one representative of more than three experiments. For gating strategy of B cell subsets and T cell subsets see Methods. **C**. Phenotype of NK CD11b<sup>int/-</sup> cells and NK CD11b<sup>hi</sup> cells upregulated in spleen after Poly(I:C) i.p. injection. NK cell subset phenotypes: CD11b<sup>int/-</sup> NK cells, NK1.1<sup>+</sup>Ly6G<sup>-</sup>CD49b<sup>+</sup>NKp46<sup>lo</sup>Ly-49C<sup>+/-</sup>CD127<sup>-</sup>; CD11b<sup>hi</sup> NK cells, NK1.1<sup>+</sup>Ly6G<sup>hi</sup>CD49b<sup>+</sup>NKp46<sup>hi</sup>Ly-49C<sup>hi</sup>CD127<sup>-</sup>. **D** and **E**, BAFF-RFP mice and BAFF-RFP *Ifnar*<sup>-/-</sup> mice (**D**) and BAFF-RFP *Mavs*<sup>-/-</sup> mice (**E**) were left untreated or treated i.p. with 200µg/mouse Poly(I:C) for 24 hrs. **D** and **E**, bar graphs show means ± SEM of % of BAFF-RFP<sup>+</sup> BM cells and summarize data from two independent experiments (N=6-7). Dotted lines show RFP<sup>+</sup> background in WT and *Ifnar*<sup>-/-</sup> (**D**) or *Mavs*<sup>-/-</sup> (**E**) mice that were included as controls in each experiment. Statistics were performed by one-way ANOVA corrected with Holm-Sidak method for multiple comparisons; \*  $p < 0.05$ , \*\*  $p < 0.01$ , \*\*\*  $p < 0.001$ , \*\*\*\*  $p < 0.0001$ .

**Supplemental Table S1. Phenotype of myeloid precursors in BM**

| Cell Phenotype                         | Cell Name                            | Cell marker |        |      |      |       |          |
|----------------------------------------|--------------------------------------|-------------|--------|------|------|-------|----------|
|                                        |                                      | CD115       | CX3CR1 | CCR2 | Ly6G | MHCII | BAFF-RFP |
| Ly6C <sup>-</sup> CD11c <sup>-</sup>   | CD11b <sup>+</sup> myeloid precursor | -           | -      | -    | -    | -     | ++       |
| Ly6C <sup>int</sup> CD11c <sup>-</sup> | Nph prec                             | -           | -      | -    | +    | -     | ++       |
| Ly6C <sup>int</sup> CD11c <sup>-</sup> | Nph                                  | -           | -      | -    | +++  | -     | +++      |
| Ly6C <sup>hi</sup> CD11c <sup>-</sup>  | Ly6C <sup>hi</sup> MO                | ++          | ++     | ++++ | -    | -     | +/-      |
| Ly6C <sup>hi</sup> CD11c <sup>+</sup>  | Ly6C <sup>hi</sup> DC/Mph            | +++         | +++    | +++  | +    | +     | ++       |
| Ly6C <sup>-</sup> CD11c <sup>+</sup>   | preDC                                | ++          | +++    | +    | -    | +     | +        |

+ and – indicates MFI levels of cell markers
